# Supplementary material
Source: Research Square preprint supplement (doi:10.21203/rs.3.rs-10061658/v1)

**Supplementary Information**

**Variance-weighted social power bounds both the cost and the detectability of steering a networked consensus**

This document contains derivations, extended computational results, public-data calibration detail, and the design analysis for a proposed future experiment. The proposed experiment is **not part of the main results**; it is included to show the framework is empirically testable and to record the operating characteristics of a possible future study. All numbers below are produced by the released, seeded pipeline.

# Supplementary Note 1 — Derivations

## S1.1 Steady-state response and the influence vector

With μᵗ = (I-Γ)Wμᵗ⁻¹ + Γxᵗ and a constant signal mean E[xᵗ]=a, the expected belief vector converges (spectral radius of (I-Γ)W is <1 for Γ≻0, W row-stochastic and irreducible) to the fixed point

The influence-weighted consensus is therefore

For Γ=γI, M⁻¹Γ = γ(I-(1-γ)W)⁻¹, and since vᵀ is a left eigenvector of W with eigenvalue 1, vᵀγ(I-(1-γ)W)⁻¹ = γfrac11-(1-γ)vᵀ = vᵀ, giving c=v exactly. The correct linear system for the heterogeneous case is Mᵀy = v, c = Γy (the order matters: Γ and M⁻ᵀ do not commute), verified against brute-force iteration of the deterministic dynamics to a tolerance of 10⁻⁶.

## S1.2 The fragility rate

The adversary solves

The Lagrangian has stationarity Σ⁻¹a = λc, i.e. a = λΣc; the constraint gives λ = θ/(cᵀΣc), hence

The objective is strictly convex (Σ≻0), so the stationary point is the global minimum. With c=v, Σ=τ²I, ρ = θ²/(2τ²‖v‖²). The rate has no γ dependence because the steady-state mean depends only on the constraint cᵀa=θ, not on the convergence speed.

## S1.3 Natural-volatility corollary

For homogeneous γ, Bₜ = (1-γ)Bₜ₋₁ + γξₜ, ξₜ = vᵀxᵗ, Var(ξₜ)=vᵀΣv. This AR(1) has stationary variance

The heterogeneous case has belief covariance solving the discrete Lyapunov equation P = APAᵀ + ΓΣΓ, A=(I-Γ)W, and Var(B∞)=vᵀPv. Simulation matches both forms to <0.2% relative error after burn-in; the homogeneous and heterogeneous expressions agree when Γ=γI.

## S1.4 Detection duality and the data-processing bound

For two Gaussians with common covariance,

identically the per-step steering cost. The Chernoff–Stein lemma states that for n i.i.d. observations, the minimum type-II error subject to a fixed type-I bound decays as exp(-nKL); thus the per-step KL is the optimal detector's error exponent. For a scalar projection y=dᵀx, honest ysim N(0,dᵀΣd) and steered ysim N(dᵀa,dᵀΣd), so its exponent is (dᵀa)²/(2dᵀΣd). Writing the Σ-inner-product ⟨u,w⟩_Σ = uᵀΣw, Cauchy–Schwarz gives (dᵀa)² = ⟨d, a⟩² where a=Σ⁻¹(Σa); more directly

The inequality holds with equality iff Σ^1/2d ∝ Σ^-1/2a, i.e. d ∝ Σ⁻¹a. At a*=θΣc/F, Σ⁻¹a* ∝ c, so the consensus monitor d=c attains equality and its exponent is (cᵀa*)²/(2cᵀΣc) = θ²/(2F) = ρ.

## S1.5 Persistent versus endpoint adversary; KL-control extension

A persistent adversary holding E[Bₜ]=θ every step over a window of length T pays total KL = Tρ. An endpoint-only target (E[B_T]=θ) admits a bounded total cost that does not grow with T (total/T → 0); the rate ρ describes only the persistent case. A finite-horizon feedback adversary can be cast as a linearly-solvable KL-control problem (refs 10, 11): the value recursion zₜ(B)=e^-q(B)E_π₀[z_t+1] is linear in the exponentiated value. I verify internal consistency in the stationary regime: the pure mean-shift control attains exactly ρ per step, while a soft-tracking optimum that also suppresses fluctuations pays strictly more than ρ once it tracks the target—so ρ is the mean-only lower bound. This extension is exploratory and is not used in the main results.

# Supplementary Note 2 — Extended computational results

## S2.1 Detection exponents match across topologies (Supplementary Table 1)

For every topology × covariance combination at N=12, the full-signal-vector Chernoff–Stein exponent and the consensus-monitor exponent both equal the fragility rate ρ to machine precision. Representative values: complete graph, i.i.d., F=0.0833, ρ=full=consensus=6.00; complete, common-shock, F=0.358, ρ=1.40; Barabási–Albert, central-accurate, F=0.0910, ρ=5.49. The CUSUM monitor on the whitened consensus innovation gives a detection delay whose product with ρ is approximately constant across topologies (range ≈ 6–9 for a log-likelihood threshold of 5, consistent with Wald's identity plus discrete overshoot), confirming the 1/ρ scaling. Source: output/tables/detection_diagnostics.csv.

## S2.2 Maximin design ranking (Supplementary Table 2)

Worst-case F and ρ over the four covariance regimes for each eligible network at N=12 (usability cap on the maximum single influence weight). De-concentrated networks share the top robustness: cycle, complete, and 2-/4-regular graphs each have worst-case F=0.358, ρ=1.40, and ‖v‖²=1/12; small-world (ρ≈1.39) and scale-free graphs follow; the star and weighted-hub networks are most fragile. Source: output/tables/minimax_defender.csv, output/tables/design_optimization.csv.

# Supplementary Note 3 — Public-data calibration detail

**Almaatouq et al. 2020 (CC0).** "Guess the Correlation" estimation in static and dynamic networks of 12, 20 rounds with a mid-task signal-quality change. Per-round social weight is estimated from belief revisions; clipped condition means: static 0.31, dynamic 0.39, dynamic full-feedback 0.40, dynamic no-feedback 0.30, dynamic self-feedback 0.30 (self-weights 0.60–0.70). Retained data anomalies are reported and handled by fixed rules (duplicate participant-round keys, missing neighbor identifiers, and the fraction of reconstructed network-rounds that are strongly connected). Reconstructed influence concentration is endogenous to participants' linking and is treated as observational.

**Kao et al. 2018 (CC BY 4.0).** Numerosity estimation with controlled announced social-group sizes. Social weight among revisers ≈0.37 overall, rising with announced group size (≈0.23 at size 1 to ≈0.41 at size 50); revision-toward-signal rate ≈0.85 among changers. Estimation bias grows with the true magnitude (arithmetic relative error ≈0.34, 0.02, 0.10, 0.22, 1.40 across the five tested numerosities), motivating log-domain analysis. Source: data/external/kao_2018/derived/*.csv.

These analyses calibrate empirical self/social weights and signal-precision ranges and provide external plausibility; they are not a causal or confirmatory test of the fragility law.

# Supplementary Note 4 — Proposed future experiment and its design analysis (NOT part of the main results)

The fragility law makes behavioral predictions (P1: groups with larger F require lower steering cost; P2: F predicts steering cost better than topology alone; P5: larger F yields larger natural volatility with no adversary). Testing them requires a prospective assigned-network experiment that this work does not run. We record the design and its operating characteristics so the framework is demonstrably testable.

## S4.1 Identification and the errors-in-variables model

In a future experiment, F would be estimated from finite pre-perturbation rounds and the steering cost measured from the response to a bounded persistent signal-mean perturbation, with the regressor and the cost estimated from disjoint blocks of rounds so the confirmatory slope is a genuine statistic rather than an identity. Because the regressor log F̂ is measured with error, ordinary least squares attenuates the slope toward zero. A hierarchical Bayesian errors-in-variables model treats log F as a latent covariate measured with group-specific error. In calibration (output/tables/eiv_attenuation.csv), ordinary least squares attenuates a true slope of −1.0 to −0.95, −0.84, −0.70, and −0.56 as the measurement-error standard deviation increases (0.2 → 0.8), whereas the errors-in-variables posterior recovers −0.98, −0.96, −0.93, and −0.88 with 95% credible intervals that cover the truth at every level. Simulation-based calibration of the sampler gives uniform rank statistics (output/tables/eiv_sbc.csv: rank mean 502.9 vs expected 500.0 over 1,000 posterior draws; Kolmogorov–Smirnov p = 0.31).

## S4.2 Power, Type-I, and sequential-Bayes-factor design analysis

On a parametric model calibrated to the forward pipeline (log F spread ≈0.69; residual standard deviation 0.21 when the DeGroot analysis model is correct, 0.51 under Friedkin–Johnsen misspecification), a-priori frequentist power at a pre-specified smallest effect of interest (slope −0.3) is ≈1.00 at 120 groups under correct specification and ≈0.99 under misspecification (output/tables/design_power_sesoi.csv). The false-positive calibration at the null (slope 0) gives a frequentist Type-I rate ≈0.06 and a Bayes-factor-exceeds-10 rate of ≈0.001—the test almost never fires absent an effect. A sequential-Bayes-factor design analysis (output/tables/bfda.csv) stops for the alternative with probability 1.0 and expected accrual near the minimum under the structural effect, and false-stops for the alternative with probability ≈0.008 under the null. Both inference routes (frequentist power ≥0.95 at the smallest effect of interest, or a sequential Bayes factor with threshold 10) are available; the choice would be pre-registered.

## S4.3 Deception-free co-primary and feasibility

The natural-volatility corollary furnishes a confirmatory route with no manipulation: regress log consensus variance on log F̂ and test for a positive slope. In simulation (output/tables/volatility_power.csv) this test has power ≈1.0 with a positive slope (≈1.1) under both the correct and the misspecified update model. A conservative (no-backfill) feasibility projection (output/tables/pilot_feasibility.csv) indicates that, requiring at least 9 of 12 synchronous members usable at 75% per-participant completion, ≈30% of recruited groups are analyzable, so ≈330 recruited groups (≈3,950 participants) would be needed per 100 analyzable groups; lobby-based dynamic group formation and over-recruitment are the standard mitigations.

## S4.4 Update-model comparison

DeGroot-with-signals is one model; a future analysis would fit and compare DeGroot, stubborn Friedkin–Johnsen, and weighted-median rules on pre-perturbation trajectories and recompute c under the best-supported rule. The released compare_update_models routine recovers the true generating model from simulated trajectories by an information criterion.

# Supplementary Figures

- **Supplementary Fig. 1** (output/figures/fig3_inference_design.*). Design analysis for the proposed

future experiment: (a) forward-simulation slope versus number of groups under correct and misspecified update models; (b) ordinary-least-squares attenuation versus errors-in-variables recovery across measurement noise; (c) simulation-based-calibration rank check; (d) maximin-defender ranking by worst-case ρ.

The public-data calibration (Almaatouq et al. social weights and reconstructed concentration; Kao et al. bias-by-magnitude and social weight by group size) is presented in main-text Fig. 2; the full numeric detail is in the derived tables under data/external/*/derived/.

# Supplementary references

Schönbrodt, F. D. & Wagenmakers, E.-J. Bayes factor design analysis. *Psychon. Bull. Rev.* **25**, 128–142 (2018). https://doi.org/10.3758/s13423-017-1230-y · Arechar, A. A., Gächter, S. & Molleman, L. Conducting interactive experiments online. *Exp. Econ.* **21**, 99–131 (2018). https://doi.org/10.1007/s10683-017-9527-2 · Talts, S. et al. Validating Bayesian inference algorithms with simulation-based calibration. Preprint at arXiv:1804.06788 (2018).

# Figures

## fig3 inference design


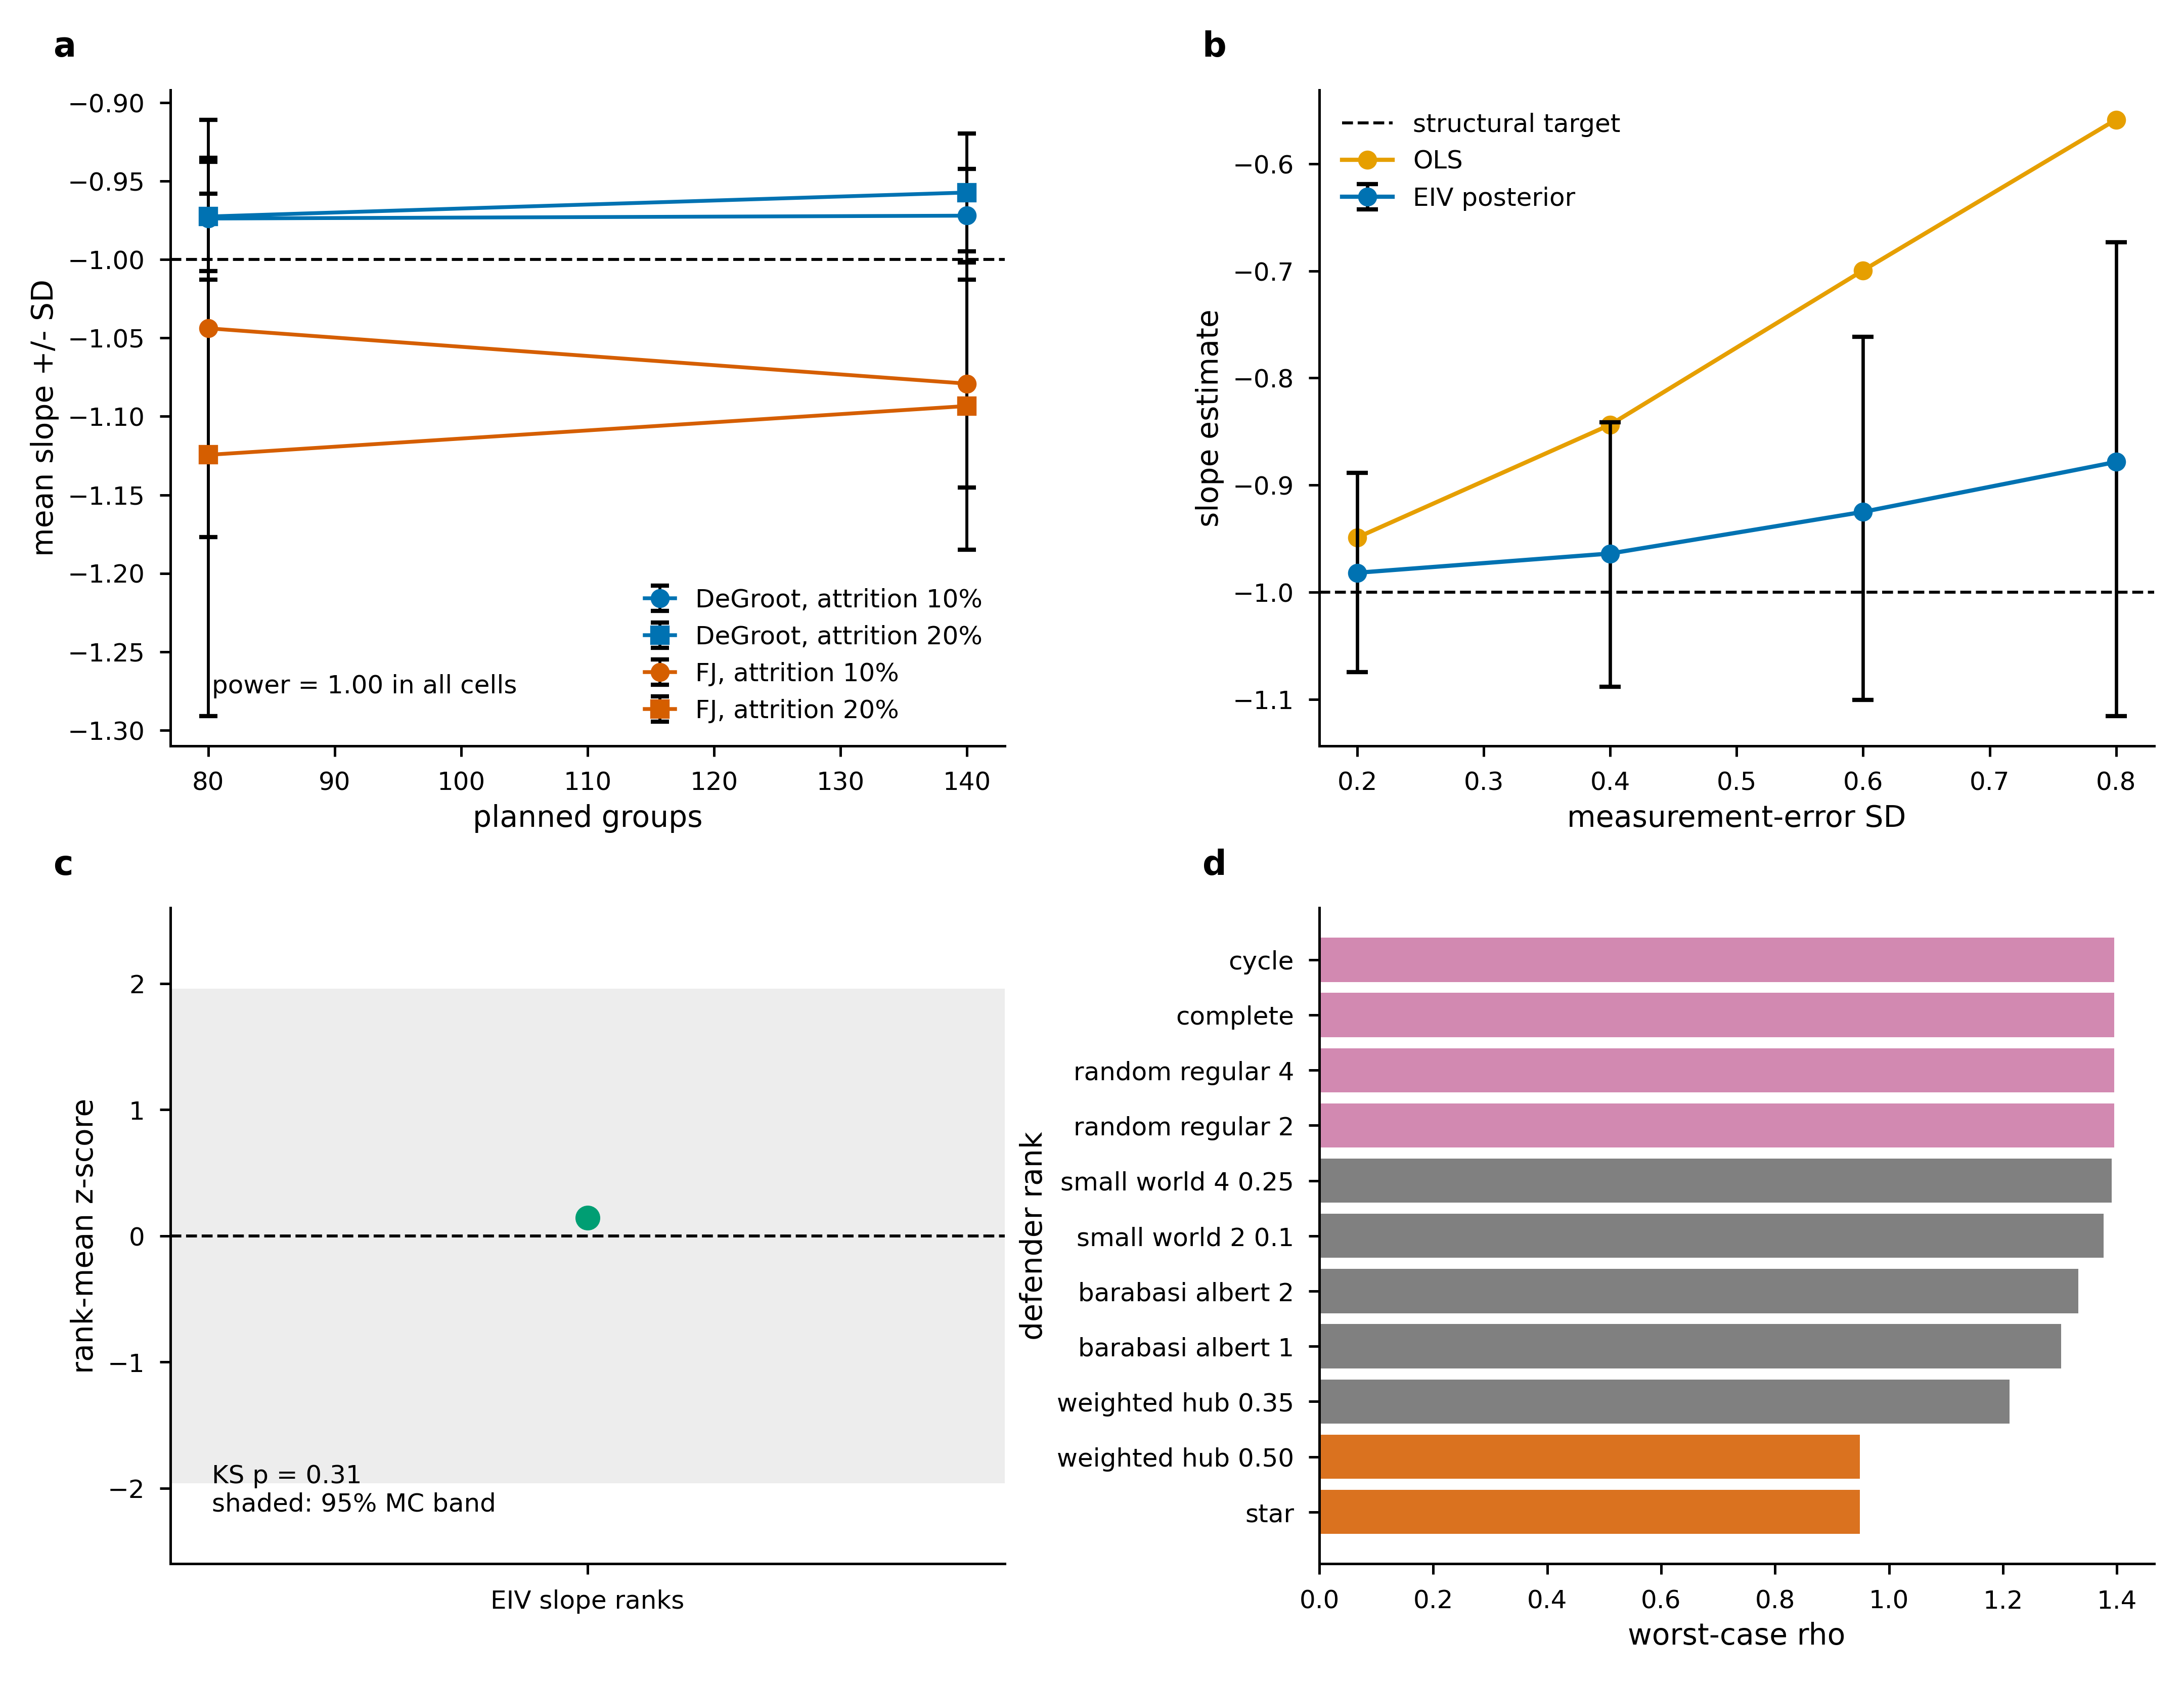

Supplement: Supplementary file 1 [file 1842ca75fde18d03b29846da.docx]
